# Supplementary material for: Fusarium Species Causing Pepper Wilt in Russia: Molecular Identification and Pathogenicity
Source: MDPI journal article supplement (doi:10.3390/microorganisms12020343), 2024-02-06
Supplement: s1 [file s1]

**Supplementary S1.** Information on the type strains of *Fusarium* used in the phylogenetic study.

| <b>Fusarium species</b>    | <b>Species complex</b> | <b>Strain</b>                      | <b>Source</b>               | <b>Country</b> | <b>GenBank acc. no.</b> |
|----------------------------|------------------------|------------------------------------|-----------------------------|----------------|-------------------------|
| <i>F. equiseti</i>         | FIESC                  | CBS 307.94 = NRRL 26419 T          | Soil                        | Germany        | GQ505599                |
| <i>F. clavus</i>           | FIESC                  | CBS 126202 = RMF N 38 T            | Desert surface soil         | Namibia        | MN170456                |
| <i>F. commune</i>          | FNSC                   | CBS 110090 = NRRL 31076 T          | <i>Pisum sativum</i>        | Denmark        | AF362263                |
| <i>F. oxysporum</i>        | FOSC                   | CBS 144134 T                       | Rotten potato tuber         | Germany        | MH485044                |
| <i>F. solani</i>           | FSSC                   | NRRL 66304 T                       | Potato tuber                | Slovenia       | KT313611                |
| <i>F. sporotrichioides</i> | FSAMSC                 | NRRL 36295 = CBS 178.64 R          | Tobacco seedling root       | Belgium        | MW233116                |
| <i>F. torulosum</i>        | FTSC                   | CBS 126.95 = NRRL 36226 R          | <i>Pinus sp.</i>            | Australia      | OL772750                |
| <i>F. verticillioides</i>  | FFSC                   | CBS 125.73=ATCC 24378=NRRL 25057 R | <i>Trichosanthes dioica</i> | India          | MW402012                |
